# Supplementary material for: Genome-wide DNA methylation and gene expression patterns reflect genetic ancestry and environmental differences across the Indonesian archipelago
Source: PLoS Genet. 2020 May 26;16(5):e1008749. doi: 10.1371/journal.pgen.1008749 (PMC7274483; doi:10.1371/journal.pgen.1008749)
Supplement: S2 Table — (XLSX) [file pgen.1008749.s002.xlsx]

## Sheet: Supplementary Table 2
Supplementary Table 2. RNA sequencing sample information. Estimated blood cell type proportions based on DeconCell are given.
												DeconCell	DeconCell	DeconCell	DeconCell	DeconCell	DeconCell	ABIS	ABIS	ABIS	ABIS	ABIS	ABIS	Houseman et al	Houseman et al	Houseman et al	Houseman et al	Houseman et al	Houseman et al
Sample ID	Island	Village	Sampling date	Age	RNA extraction batch	DNA extraction date	DNA extraction kit	Sequencing pool	RIN	RNA sequencing batch	Mapped reads	Granulocytes	B cells (CD19+)	CD4+ T cells	CD8+ T cells	NK cells (CD3- CD56+)	Monocytes (CD14+)	Granulocytes	B cells (CD19+)	CD4+ T cells	CD8+ T cells	NK cells (CD3- CD56+)	Monocytes (CD14+)	Granulocytes	B cells (CD19+)	CD4+ T cells	CD8+ T cells	NK cells (CD3- CD56+)	Monocytes (CD14+)
MPI-025	Korowai	Basman	21/02/2016	25	Spring16_0304	02/08/2016	MagAttract HMW DNA Kit	1_5	5.8	1	11852825	47.8741	2.71942	19.8112	10.1639	4.75569	7.02864	47.2596	10.7866	25.3802	3.64293	1.88163	11.0491	39.8068	10.7849	13.4401	14.0255	12.3629	9.57976
MPI-048	Korowai	Basman	21/02/2016	50	Spring16_0304	02/08/2016	MagAttract HMW DNA Kit	1_11	6.5	1	9201877	51.4167	2.48538	17.3672	10.3092	3.9148	7.09772	37.9651	11.7706	24.8379	10.7731	1.58603	13.0673	58.4393	6.18857	6.47894	10.5624	12.0692	6.26164
MPI-051	Korowai	Basman	21/02/2016	50	Spring16_05	28/07/2016	MagAttract HMW DNA Kit	1_4	5.8	1	10185341	46.6565	2.82808	20.5779	8.76692	5.8383	6.32111	41.8474	9.41218	29.2746	2.57756	6.65967	10.2286	40.3518	9.74494	11.3427	11.3062	26.5074	0.747009
MPI-061	Korowai	Basman	21/02/2016	30	Spring16_05	28/07/2016	Gentra Puregene Blood Kit	1_11	5.7	1	10031196	47.221	2.88967	24.2403	8.73598	4.80954	5.90578	50.393	7.42025	24.9653	1.62968	4.61165	10.9801	46.9746	9.60869	25.2029	9.36681	8.76451	0.0824184
MPI-065	Korowai	Basman	21/02/2016	35	Spring16_05	28/07/2016	MagAttract HMW DNA Kit	1_3	5.5	1	11353077	50.0734	3.09028	20.074	8.59703	4.22002	6.43648	45.0654	14.0525	25.2946	5.08053	2.70241	7.80456	55.8741	9.97845	10.8948	6.32381	16.3513	0.577522
MPI-242	Korowai	Basman	22/02/2016	35	Spring16_0708	01/08/2016	MagAttract HMW DNA Kit	1_1	6.1	1	12440925	51.6718	2.80155	19.2106	10.1849	3.24062	7.47887	45.9993	14.3843	17.4232	1.44856	0.28262	20.4621	70.4699	6.67615	7.30649	0.643093	4.91055	9.99382
MPI-318	Korowai	Basman	22/02/2016	35	BatchIreneAndChelzie3	01/08/2016	MagAttract HMW DNA Kit	1_7	6.8	1	13304365	49.6296	2.92387	21.7136	8.58202	4.17612	6.52067	55.5556	9.05504	21.5992	1.59917	2.46106	9.73001	51.6463	9.67961	18.0458	7.74628	8.18629	4.6957
MPI-333	Korowai	Basman	22/02/2016	31	ChelzieJanFeb2017_2	02/08/2016	MagAttract HMW DNA Kit	1_9	6.5	1	12221526	52.3849	1.91018	19.74	7.82014	4.05037	7.07859	67.0217	2.45229	14.4252	1.64225	1.25388	13.2046	63.3605	4.54754	13.2632	4.61161	7.09452	7.12259
MPI-334	Korowai	Basman	22/02/2016	19	ChelzieJanFeb2017_7	03/08/2016	MagAttract HMW DNA Kit	2_1	7.3	2	17949419	45.164	2.92687	21.5947	10.7066	4.3349	6.50296	59.6433	16.165	15.3289	-2.45262	-0.766444	12.0819	40.1575	11.783	19.9374	14.2639	9.88024	3.978
MPI-335	Korowai	Basman	22/02/2016	45	ChelzieJanFeb2017_21	03/08/2016	MagAttract HMW DNA Kit	1_8	7.4	1	12012653	48.1181	3.01133	19.9521	7.88389	3.80254	6.79163	55.7561	15.0421	16.446	1.54432	1.08303	10.1284	46.0778	8.49863	19.1321	11.6492	7.95603	6.68624
MPI-336	Korowai	Basman	22/02/2016	35	ChelzieJanFeb2017_27	31/05/2016	Gentra Puregene Blood Kit	1_12	7.4	1	19221088	56.6876	2.27321	20.421	7.91713	3.04375	7.11594	70.3851	4.93188	10.8285	0.939124	0.413451	12.502	77.967	2.40943	10.9041	0	1.56163	7.15776
MPI-345	Korowai	Basman	22/02/2016	18	ChelzieJanFeb2017_1	01/08/2016	MagAttract HMW DNA Kit	2_2	7.1	2	16912548	50.1078	2.32688	20.9295	9.33992	2.83465	7.17582	58.1151	5.96939	17.442	-1.37732	-1.19989	21.0507	52.939	5.57653	16.9623	9.56118	2.20478	12.7561
MPI-369	Korowai	Basman	22/02/2016	30	ChelzieJanFeb2017_19	01/08/2016	MagAttract HMW DNA Kit	1_11	7.3	1	18056497	49.7934	2.48458	20.6937	9.64025	3.39392	7.02314	58.4725	7.80035	18.2048	1.33824	0.319489	13.8646	58.4707	5.02106	15.9572	6.07838	6.3275	8.14519
MPI-376	Korowai	Basman	22/02/2016	30	ChelzieJanFeb2017_14	01/08/2016	MagAttract HMW DNA Kit	1_3	7	1	15366394	51.5595	2.97938	16.8163	9.53108	2.79576	7.21902	55.4691	20.4857	13.5915	0.782989	-0.670711	10.3414	54.5206	14.3596	11.2942	2.44287	10.4149	6.96793
MPI-378	Korowai	Basman	22/02/2016	20	ChelzieJanFeb2017_25	02/08/2016	MagAttract HMW DNA Kit	2_3	7.5	2	14585099	50.4202	2.03916	21.0144	11.2124	2.92844	6.54493	63.6108	8.1303	15.6664	0.216088	-0.683377	13.0598	51.7852	6.33618	18.0082	11.9421	3.75147	8.1769
MPI-379	Korowai	Basman	22/02/2016	45	ChelzieJanFeb2017_7	03/08/2016	MagAttract HMW DNA Kit	1_1	6.8	1	13214473	53.0307	2.91805	20.9961	9.34788	3.14301	6.94952	60.3335	7.53243	14.158	4.45098	0.755094	12.77	53.4835	10.4124	15.5933	5.04198	5.01902	10.4498
MPI-381	Korowai	Basman	22/02/2016	34	ChelzieJanFeb2017_18	01/08/2016	MagAttract HMW DNA Kit	1_2	7.8	1	14467641	50.8573	2.90546	20.7363	10.0309	5.31611	6.53197	49.5346	13.9632	18.0234	7.30838	1.46564	9.70489	53.2249	10.849	8.83468	7.01628	14.0256	6.04954
MPI-381	Korowai	Basman	22/02/2016	34	ChelzieJanFeb2017_18	01/08/2016	MagAttract HMW DNA Kit	3_1	7.8	3	16950588	51.1147	2.84188	19.5798	10.344	5.36329	6.32193	n/a	n/a	n/a	n/a	n/a	n/a	n/a	n/a	n/a	n/a	n/a	n/a
MPI-383	Korowai	Basman	23/02/2016	50	ChelzieJanFeb2017_24	02/08/2016	MagAttract HMW DNA Kit	1_10	6.8	1	14005343	58.2839	2.00891	16.3625	6.54369	4.12319	7.39463	72.1671	2.37286	11.4183	0.550397	0.289025	13.2024	68.9902	3.86515	8.66901	3.02097	5.32468	10.13
MPI-389	Korowai	Basman	22/02/2016	30	ChelzieJanFeb2017_19	01/08/2016	MagAttract HMW DNA Kit	1_9	6.7	1	15150455	49.1606	2.73057	19.8507	10.8548	4.96805	6.72979	54.6106	6.47941	8.46016	15.1074	2.36124	12.9812	41.8222	7.82739	13.1237	15.8724	15.2613	6.09306
MTW-MDB-001	Mentawai	Madobag	13/04/2016	44	ChelzieJanFeb2017_26	17/08/2016	MagAttract HMW DNA Kit	1_11	5.9	1	15993516	50.1734	2.26029	22.4114	7.87016	6.50058	6.71419	56.7956	2.70117	19.619	-4.16548	7.56326	17.4865	63.2197	3.66778	16.2141	0	12.2199	4.67858
MTW-MDB-002	Mentawai	Madobag	13/04/2016	46	ChelzieJanFeb2017_Chip19	17/08/2016	MagAttract HMW DNA Kit	1_5	6	1	13563513	47.2327	3.34919	21.5182	9.92504	6.51569	6.45995	36.7819	5.22185	28.235	11.1196	8.60133	10.0403	45.8696	10.7145	10.5238	7.92463	21.3819	3.58567
MTW-MDB-003	Mentawai	Madobag	13/04/2016	23	ChelzieJanFeb2017_1	06/09/2016	Gentra Puregene Blood Kit	2_1	6.5	2	18110026	45.9565	2.62526	21.4765	10.7127	5.31497	6.69897	56.0563	4.90513	16.6116	-0.13352	0.463871	22.0966	42.0472	7.307	15.8452	12.7503	15.0777	6.97254
MTW-MDB-009	Mentawai	Madobag	13/04/2016	43	ChelzieJanFeb2017_16	2016-09-06	Gentra Puregene Blood Kit	1_2	6.6	1	14107771	47.8321	2.02802	20.2034	9.33261	5.10818	6.79173	50.4891	3.22297	23.3258	3.53649	2.11939	17.3062	52.7765	1.32094	11.6755	6.86274	16.8642	10.5001
MTW-MDB-011	Mentawai	Madobag	13/04/2016	56	ChelzieJanFeb2017_16	2016-09-06	Gentra Puregene Blood Kit	1_11	6.6	1	12902636	47.6863	2.36006	21.3184	8.94242	5.24285	6.20045	45.5101	3.6159	32.567	4.75335	2.62213	10.9315	51.9712	4.6465	11.6476	10.0922	21.6425	0
MTW-MDB-014	Mentawai	Madobag	13/04/2016	35	ChelzieJanFeb2017_10	12/05/2017	MagAttract HMW DNA Kit	1_7	6.1	1	13053255	47.7354	2.96956	22.9638	9.06805	5.72167	6.22986	58.732	4.16616	18.8018	0.769657	4.89659	12.6337	53.5574	8.07715	13.1317	5.42239	16.9081	2.90323
MTW-MDB-015	Mentawai	Madobag	13/04/2016	30	ChelzieJanFeb2017_27	12/05/2017	MagAttract HMW DNA Kit	1_6	6.4	1	12383533	50.7258	2.61512	21.1731	8.91041	4.60606	6.05289	72.0087	3.19437	14.8349	-1.36437	2.29561	9.03086	65.593	5.19142	8.88808	8.84713	8.61152	2.86889
MTW-MDB-016	Mentawai	Madobag	13/04/2016	39	ChelzieJanFeb2017_5	2016-09-09	Gentra Puregene Blood Kit	1_3	6.4	1	12186986	60.1208	1.86913	18.3363	7.26129	3.70535	6.48085	82.3807	1.13378	7.63478	-0.861253	0.808205	8.90377	84.9174	0	6.977	4.42118e-17	2.51768	5.58788
MTW-MDB-019	Mentawai	Madobag	13/04/2016	36	ChelzieJanFeb2017_1	12/06/2017	MagAttract HMW DNA Kit	1_2	6.3	1	17288224	57.4557	2.13034	17.1185	7.47451	4.56233	6.85218	71.5923	2.29213	13.7738	-0.590907	1.57715	11.3555	67.4853	4.07932	6.6876	3.65211	12.1811	5.9146
MTW-MDB-020	Mentawai	Madobag	13/04/2016	31	ChelzieJanFeb2017_9	17/08/2016	MagAttract HMW DNA Kit	1_7	6.7	1	12367711	50.5095	2.53543	21.3092	9.69726	5.27597	6.62266	58.5673	3.5455	16.0939	6.92159	2.96467	11.9071	53.1126	6.16219	12.352	13.47	11.5488	3.35443
MTW-MDB-024	Mentawai	Madobag	13/04/2016	50	ChelzieJanFeb2017_8	12/05/2017	MagAttract HMW DNA Kit	1_7	6.6	1	15020932	48.8884	2.47562	21.1857	11.1882	5.39209	6.15657	64.0261	3.24069	16.2034	6.43637	1.46281	8.63058	51.2346	5.87975	10.1098	12.8273	17.1268	2.82177
MTW-MDB-025	Mentawai	Madobag	13/04/2016	48	ChelzieJanFeb2017_9	12/05/2017	MagAttract HMW DNA Kit	1_7	6.8	1	15931643	48.1759	2.52221	21.5956	9.1843	5.32745	7.11677	52.1677	3.07252	20.5702	2.13514	2.39552	19.6589	46.0511	6.35037	13.8966	9.41767	16.6936	7.59057
MTW-MDB-026	Mentawai	Madobag	13/04/2016	41	ChelzieJanFeb2017_22	12/05/2017	MagAttract HMW DNA Kit	1_10	6.2	1	13940359	50.9594	2.54233	22.7596	9.51704	4.43972	6.49861	54.2596	3.54314	22.0086	0.62277	2.39434	17.1715	54.0157	6.05269	23.6845	6.20201	6.41648	3.62863
MTW-MDB-028	Mentawai	Madobag	13/04/2016	41	ChelzieJanFeb2017_8	12/05/2017	MagAttract HMW DNA Kit	1_10	6.3	1	12061994	48.8691	2.32457	22.2874	9.08679	5.92938	6.53586	59.4406	2.50404	19.0842	-0.0644244	6.51537	12.5202	49.6208	4.41935	16.8196	6.96579	18.7041	3.47038
MTW-MDB-032	Mentawai	Madobag	13/04/2016	42	ChelzieJanFeb2017_7	12/05/2017	MagAttract HMW DNA Kit	1_3	5.7	1	14389580	49.855	3.03762	23.1118	8.43926	4.70788	6.23604	43.339	7.08263	25.8974	4.92652	4.30017	14.4543	50.3092	9.3763	14.6893	11.2821	10.1469	4.19624
MTW-MDB-034	Mentawai	Madobag	13/04/2016	46	ChelzieJanFeb2017_27	12/05/2017	MagAttract HMW DNA Kit	1_10	6.5	1	10469970	48.3933	3.19676	23.0903	8.3489	4.63671	6.30693	49.7436	7.9021	22.9604	2.30769	3.79953	13.2867	50.4974	10.4434	19.5672	6.18858	10.514	2.78944
MTW-MDB-035	Mentawai	Madobag	13/04/2016	31	ChelzieJanFeb2017_25	10/09/2016	Gentra Puregene Blood Kit	1_5	6.3	1	13689393	51.8541	2.66152	21.5572	9.64137	5.64878	6.26806	65.9642	3.9754	18.6809	-1.59471	2.64267	10.3315	51.7491	6.27321	12.911	9.25061	17.3404	2.47571
MTW-TLL-002	Mentawai	Taileleu	2016-03-10	49	ChelzieJanFeb2017_13	06/06/2017	MagAttract HMW DNA Kit	2_1	7.4	2	19291979	50.665	2.22429	19.8813	9.38153	4.39849	6.61285	72.3361	2.85047	15.1834	-0.353802	-2.06265	12.0465	65.1715	3.93379	9.76626	3.90271	13.2528	3.97295
MTW-TLL-006	Mentawai	Taileleu	2016-03-10	45	ChelzieJanFeb2017_14	2016-06-29	Gentra Puregene Blood Kit	2_1	7.3	2	19819347	50.3595	2.47665	17.892	7.70332	5.47962	6.83713	74.0693	3.12142	15.0344	-8.08992	1.71821	14.1466	50.6372	6.28891	10.7613	0.320677	28.7525	3.23941
MTW-TLL-007	Mentawai	Taileleu	2016-03-10	59	ChelzieJanFeb2017_6	06/06/2017	MagAttract HMW DNA Kit	1_4	7.7	1	13556176	47.5041	3.1238	23.1478	9.38349	4.38401	6.53365	45.7168	7.20802	22.8386	4.02646	1.068	19.1422	51.516	10.959	14.6619	7.06636	10.8801	4.91657
MTW-TLL-008	Mentawai	Taileleu	2016-03-10	38	ChelzieJanFeb2017_9	2016-06-29	Gentra Puregene Blood Kit	1_4	7.9	1	11612602	48.6778	2.5564	23.8475	9.37375	5.56224	6.68642	51.6978	4.14757	18.9167	8.57714	4.08883	12.572	45.819	4.57053	22.1292	14.8916	8.75314	3.83648
MTW-TLL-010	Mentawai	Taileleu	2016-03-10	42	ChelzieJanFeb2017_13	2016-06-29	Gentra Puregene Blood Kit	2_2	7.2	2	18246412	45.2195	3.12415	20.5926	8.54998	5.37227	6.54526	61.3116	12.1373	20.6392	-19.5031	-0.147314	25.5623	36.9939	13.9646	11.2123	6.45297	26.1738	5.20252
MTW-TLL-011	Mentawai	Taileleu	2016-03-10	45	ChelzieJanFeb2017_21	2016-06-29	Gentra Puregene Blood Kit	2_2	6.4	2	17419259	48.9325	2.4255	21.3187	10.2863	4.61264	6.51089	60.0028	6.06271	18.4517	5.14706	-2.55272	12.8885	52.8815	6.60815	16.5922	7.29606	13.5267	3.09539
MTW-TLL-012	Mentawai	Taileleu	2016-03-10	39	ChelzieJanFeb2017_19	2016-06-29	Gentra Puregene Blood Kit	2_3	7	2	17087363	48.4293	2.421	18.7338	10.4552	4.56438	6.30529	73.7443	3.2608	14.6736	-0.721139	-1.56769	10.6101	48.3674	7.58866	13.1761	5.29224	22.6721	2.90344
MTW-TLL-013	Mentawai	Taileleu	2016-03-10	40	ChelzieJanFeb2017_18	29/06/2016	Gentra Puregene Blood Kit	2_4	7	2	22933685	49.176	2.51017	21.7882	10.4253	4.29351	6.86782	63.4273	5.07844	15.9532	4.04148	-2.45945	13.9591	52.7794	6.94348	13.1466	9.93127	10.3924	6.80692
MTW-TLL-013	Mentawai	Taileleu	2016-03-10	40	ChelzieJanFeb2017_18	29/06/2016	Gentra Puregene Blood Kit	3_1	7	3	17471836	48.4243	2.50895	21.7566	11.1215	4.47619	6.84114	n/a	n/a	n/a	n/a	n/a	n/a	n/a	n/a	n/a	n/a	n/a	n/a
MTW-TLL-016	Mentawai	Taileleu	2016-03-10	41	ChelzieJanFeb2017_5	2016-06-29	Gentra Puregene Blood Kit	1_1	7.7	1	14888633	50.5916	2.94647	22.7359	8.60433	3.86543	7.14883	58.3138	4.22296	14.9996	3.44991	0.668059	18.3457	59.2193	8.37792	13.2694	2.5026	7.46357	9.16727
MTW-TLL-017	Mentawai	Taileleu	2016-03-10	42	ChelzieJanFeb2017_3	06/06/2017	MagAttract HMW DNA Kit	1_9	7.7	1	13156839	50.7533	2.87175	20.5541	8.58054	4.75025	6.77277	59.6638	6.67341	14.5128	0.0352277	1.99706	17.1177	66.1255	6.14077	5.37291	1.50988	12.4469	8.40403
MTW-TLL-019	Mentawai	Taileleu	2016-03-10	51	ChelzieJanFeb2017_1	2016-06-30	Gentra Puregene Blood Kit	1_4	7.2	1	18029198	48.333	3.13041	21.9225	10.2165	5.17728	6.78273	60.272	7.8598	15.2038	-0.236201	1.5611	15.3395	53.001	11.1745	15.7401	1.44469	14.0476	4.59205
MTW-TLL-020	Mentawai	Taileleu	2016-03-10	34	ChelzieJanFeb2017_2	2016-06-30	Gentra Puregene Blood Kit	1_12	7.3	1	14788507	48.1071	2.91269	24.2601	10.0874	4.92835	6.27906	58.5209	6.56691	19.1689	1.71902	2.1395	11.8847	43.7412	12.6485	19.1331	8.03402	15.42	1.02311
MTW-TLL-021	Mentawai	Taileleu	2016-03-10	34	ChelzieJanFeb2017_12	30/06/2016	Gentra Puregene Blood Kit	2_3	7	2	15207393	48.4287	2.35721	20.8623	10.2984	5.30507	6.45932	65.9855	5.51537	14.575	-9.22242	2.71248	20.434	48.6112	6.38063	13.4423	4.66709	21.509	5.38978
MTW-TLL-022	Mentawai	Taileleu	2016-03-10	46	ChelzieJanFeb2017_1	06/07/2017	MagAttract HMW DNA Kit	1_6	7.9	1	12394500	53.458	2.40782	19.584	9.65812	5.59972	6.61535	68.2096	2.3754	12.543	2.5974	3.1746	11.1	70.9325	2.80795	6.02503	0.800852	14.3953	5.0384
MTW-TLL-023	Mentawai	Taileleu	2016-03-10	35	ChelzieJanFeb2017_6	06/07/2017	MagAttract HMW DNA Kit	1_1	7.2	1	12863198	48.0905	2.90814	21.2116	10.5258	5.43673	6.50846	56.6765	3.88125	16.4503	6.95283	3.98406	12.055	63.5659	6.67172	5.70506	6.13793	13.2091	4.71021
MTW-TLL-024	Mentawai	Taileleu	2016-03-10	62	ChelzieJanFeb2017_24	06/07/2017	MagAttract HMW DNA Kit	1_10	7.4	1	14822573	48.9515	2.5423	22.7819	9.18938	4.56568	7.12197	45.8889	3.62314	19.7742	6.41704	0.822862	23.4739	59.5551	5.09476	13.873	3.17463	11.9584	6.3441
MTW-TLL-025	Mentawai	Taileleu	2016-03-10	54	ChelzieJanFeb2017_4	2016-06-30	Gentra Puregene Blood Kit	1_9	7.7	1	16523696	48.2268	3.30186	22.0311	11.7407	5.05015	6.48617	59.8473	8.53156	16.8103	-0.93784	2.22453	13.5241	49.2947	16.1789	10.3618	8.80476	10.472	4.88788
MTW-TLL-026	Mentawai	Taileleu	2016-03-10	31	ChelzieJanFeb2017_22	2016-06-30	Gentra Puregene Blood Kit	1_7	7.6	1	12838682	50.2808	2.80536	20.9666	8.9964	4.65221	6.7996	60.5815	5.15183	14.5568	-0.693662	0.910115	19.4934	60.3566	6.02039	10.6873	5.7478	10.0881	7.09981
MTW-TLL-027	Mentawai	Taileleu	2016-03-10	26	ChelzieJanFeb2017_4	06/06/2017	MagAttract HMW DNA Kit	2_3	7.3	2	15496405	49.0326	2.27729	19.2608	9.23466	4.27436	6.80672	71.5612	5.22782	10.9127	-6.42765	-1.55692	20.2828	54.7933	6.22716	9.28013	8.01207	13.0359	8.65139
MTW-TLL-029	Mentawai	Taileleu	2016-03-10	48	ChelzieJanFeb2017_11	05/06/2017	MagAttract HMW DNA Kit	1_11	7.5	1	15586120	48.5008	2.79292	23.2805	8.15475	5.8085	6.92924	46.8618	6.44793	23.0936	1.96639	4.71019	16.9201	49.8389	6.89056	19.0323	4.13055	13.5806	6.52698
MTW-TLL-030	Mentawai	Taileleu	2016-03-10	38	ChelzieJanFeb2017_15	2016-06-30	Gentra Puregene Blood Kit	2_4	6.6	2	20582209	50.2938	1.57159	19.629	11.9921	4.97588	6.5032	66.129	2.39247	14.9194	8.96505	-3.37366	10.9677	64.2086	1.26587	8.1558	7.89121	14.6369	3.84169
MTW-TLL-032	Mentawai	Taileleu	2016-03-10	36	ChelzieJanFeb2017_8	05/06/2017	MagAttract HMW DNA Kit	2_1	6.5	2	15980278	52.2859	2.04759	19.1058	8.66051	4.65945	6.57732	71.0267	2.44078	17.9397	-1.91601	-0.743218	11.252	64.9861	3.14573	9.02604	6.3923	13.9096	2.54018
MTW-TLL-034	Mentawai	Taileleu	2016-03-10	57	ChelzieJanFeb2017_23	12/05/2017	MagAttract HMW DNA Kit	1_5	7.3	1	12937393	49.181	3.16528	19.6692	8.72301	5.74319	6.66867	54.6224	4.35486	18.6637	3.74518	4.67836	13.9355	56.1802	9.57617	10.324	0.509971	17.7342	5.67559
MTW-TLL-035	Mentawai	Taileleu	2016-03-10	40	ChelzieJanFeb2017_23	2016-07-01	Gentra Puregene Blood Kit	2_3	6.9	2	15051401	51.2491	2.50431	20.7797	9.30311	4.04457	6.6799	68.5002	4.2668	15.4222	-2.5061	-1.36229	15.6792	56.483	8.0351	14.0799	5.28355	11.5796	4.53887
MTW-TLL-037	Mentawai	Taileleu	2016-03-10	60	ChelzieJanFeb2017_25	05/06/2017	MagAttract HMW DNA Kit	2_1	8	2	20228380	52.4769	2.22806	17.2116	8.03719	4.58176	7.51429	69.524	1.58272	7.67098	-0.219501	-1.77911	23.2209	70.1073	5.91129	3.77655	0	10.4721	9.73277
MTW-TLL-038	Mentawai	Taileleu	2016-03-10	50	ChelzieJanFeb2017_3	05/06/2017	MagAttract HMW DNA Kit	1_1	7.3	1	17008079	46.6056	2.71904	24.0319	10.4836	4.29294	6.91686	56.8787	7.50303	13.8895	0.15932	-1.85193	23.4214	52.2518	6.29827	16.8955	8.97813	9.81227	5.7641
MTW-TLL-039	Mentawai	Taileleu	2016-03-10	39	ChelzieJanFeb2017_8	05/06/2017	MagAttract HMW DNA Kit	1_8	7.9	1	12921728	47.4223	2.67988	23.1501	8.09189	4.38112	6.84739	56.6598	5.72467	18.1259	-0.0577683	0.899777	18.6475	56.098	5.49409	15.04	4.41557	11.2162	7.73608
MTW-TLL-040	Mentawai	Taileleu	2016-03-10	48	ChelzieJanFeb2017_18	2016-07-01	Gentra Puregene Blood Kit	2_3	7.3	2	16704787	45.8997	2.90743	24.3728	9.32676	4.77426	6.41435	61.0302	3.9817	16.9434	-3.25313	2.49068	18.8072	49.8048	11.579	20.0666	5.1015	11.1086	2.33948
MTW-TLL-041	Mentawai	Taileleu	2016-03-10	49	ChelzieJanFeb2017_19	06/06/2017	MagAttract HMW DNA Kit	2_2	7.6	2	18732878	50.906	1.90264	18.8729	9.189	4.09866	7.19171	62.6339	2.99592	14.9159	2.89393	-3.07241	19.6328	61.1855	3.18393	8.80791	4.53977	12.7834	9.49946
MTW-TLL-042	Mentawai	Taileleu	2016-03-10	50	ChelzieJanFeb2017_17	2016-07-01	Gentra Puregene Blood Kit	2_2	7.3	2	18579827	44.7553	2.45959	20.6782	10.9835	5.78771	6.54529	63.1397	5.77455	21.2656	-7.33057	-2.213	19.3638	22.1902	10.9033	12.7521	14.0076	34.6889	5.45783
MTW-TLL-043	Mentawai	Taileleu	2016-03-10	52	ChelzieJanFeb2017_27	2016-07-01	Gentra Puregene Blood Kit	1_10	8.3	1	14035763	44.0181	2.92357	21.9243	11.0612	6.74607	6.43883	41.8425	6.40854	19.8932	13.4846	4.61949	13.7517	25.8177	11.1196	12.0489	11.8805	32.9042	6.22912
SMB-ANK-003	Sumba	Anakalang	30/07/2016	63	ChelzieJanFeb2017_14	06/09/2017	MagAttract HMW DNA Kit	2_1	5	2	19972536	49.53	2.8412	18.0714	9.85986	5.23497	6.9326	51.8972	2.79049	18.7509	7.10173	-3.72066	23.1803	53.8405	9.41073	8.69867	3.78681	15.0124	9.25085
SMB-ANK-004	Sumba	Anakalang	30/07/2016	64	ChelzieJanFeb2017_24	05/06/2017	Gentra Puregene Blood Kit	1_6	6.8	1	14712078	49.4174	1.96562	19.1349	9.59382	6.04215	7.17234	49.0986	3.43946	19.9463	5.52359	4.98657	17.0055	58.0909	2.20464	10.0474	3.60197	16.9536	9.1015
SMB-ANK-005	Sumba	Anakalang	30/07/2016	76	ChelzieJanFeb2017_8	23/03/2017	Gentra Puregene Blood Kit	1_9	7	1	15830275	53.5369	2.30658	16.7141	7.3529	4.9778	7.4875	58.9487	1.31859	17.2857	0.817747	2.01667	19.6126	61.9732	3.92084	8.14679	0	10.5909	15.3683
SMB-ANK-006	Sumba	Anakalang	30/07/2016	73	ChelzieJanFeb2017_10	17/08/2016	MagAttract HMW DNA Kit	1_6	8.3	1	14854379	47.9945	1.88661	21.2249	10.6617	5.81094	7.28236	43.2131	2.00522	21.9506	9.14808	4.10536	19.5776	58.7226	2.48779	12.0254	3.24097	15.4423	8.08099
SMB-ANK-007	Sumba	Anakalang	30/07/2016	52	ChelzieJanFeb2017_19	06/09/2017	MagAttract HMW DNA Kit	1_2	6.8	1	17520705	51.6949	2.54818	19.4511	9.94858	4.05531	6.96924	55.0586	3.15338	17.138	7.08369	-0.485576	18.052	70.6271	4.16631	5.77287	5.35891	6.7641	7.31071
SMB-ANK-009	Sumba	Anakalang	30/07/2016	51	ChelzieJanFeb2017_4	22/08/2017	Gentra Puregene Blood Kit	1_4	6.2	1	18008099	52.9172	2.91791	19.6181	8.35135	5.1002	6.71913	65.5608	4.60341	11.5626	1.30754	2.48541	14.4802	69.6146	7.5562	8.04417	1.07667	8.50662	5.20177
SMB-ANK-011	Sumba	Anakalang	30/07/2016	35	BatchIreneAndChelzie3	07/12/2016	MagAttract HMW DNA Kit	1_6	7.1	1	14401624	47.8736	2.72048	22.3499	11.5215	5.5077	6.93359	47.5286	5.44357	19.6431	6.59905	4.48068	16.305	55.6094	5.88256	14.5547	4.06659	13.5523	6.33438
SMB-ANK-013	Sumba	Anakalang	30/07/2016	60	BatchIreneAndChelzie4	06/09/2017	MagAttract HMW DNA Kit	1_4	5.5	1	15833882	49.8409	2.7521	21.8602	10.0222	5.49461	6.82207	47.2316	6.40743	19.733	4.65467	2.1242	19.8491	57.5649	5.59758	13.896	3.37523	13.1066	6.45965
SMB-ANK-015	Sumba	Anakalang	30/07/2016	46	ChelzieJanFeb2017_9	16/08/17	MagAttract HMW DNA Kit	1_5	6.6	1	15260296	49.1157	2.55277	21.6346	9.73476	4.73758	6.81528	49.2863	3.95243	26.667	0.272622	1.48811	18.3336	58.1592	5.77646	15.8904	5.92332	8.15549	6.09514
SMB-ANK-016	Sumba	Anakalang	30/07/2016	72	ChelzieJanFeb2017_26	06/09/2017	MagAttract HMW DNA Kit	2_2	6.5	2	21612461	50.1741	2.00628	19.9186	10.0501	5.4657	6.76872	60.7089	2.27511	24.0478	-0.19922	1.85074	11.3166	71.732	2.89338	7.0355	1.93823	9.43277	6.96807
SMB-ANK-016	Sumba	Anakalang	30/07/2016	72	ChelzieJanFeb2017_26	2016-12-08	MagAttract HMW DNA Kit	3_1	6.5	3	17557390	50.7165	1.89596	18.0502	9.58913	5.36808	6.62753	n/a	n/a	n/a	n/a	n/a	n/a	n/a	n/a	n/a	n/a	n/a	n/a
SMB-ANK-019	Sumba	Anakalang	30/07/2016	40	BatchIreneAndChelzie1	2016-12-08	MagAttract HMW DNA Kit	1_7	7.2	1	14043051	50.5488	2.41287	19.0466	8.58576	6.21749	6.8002	59.8209	3.00896	9.11045	2.23284	5.76716	20.0597	66.485	4.61008	7.8443	1.49753	12.8314	6.73172
SMB-ANK-024	Sumba	Anakalang	30/07/2016	48	ChelzieJanFeb2017_20	06/09/2017	MagAttract HMW DNA Kit	1_5	7.3	1	13211476	49.7978	3.00154	22.1913	8.11991	5.15717	6.94927	55.9495	3.84275	15.2366	-0.281204	3.29379	21.9586	58.4756	10.8998	17.1559	0.185661	9.76206	3.52101
SMB-ANK-026	Sumba	Anakalang	30/07/2016	56	ChelzieJanFeb2017_7	21/12/2016	MagAttract HMW DNA Kit	1_9	7.4	1	14303419	60.7527	1.97495	14.989	9.96118	5.13019	7.70157	70.9635	1.0967	5.18757	3.76012	1.49708	17.495	85.6506	1.38375	1.80252	0.141516	5.60507	5.4165
SMB-ANK-027	Sumba	Anakalang	30/07/2016	35	ChelzieJanFeb2017_17	21/12/2016	MagAttract HMW DNA Kit	1_6	7.6	1	15880995	48.926	2.28307	19.5463	9.55562	5.78166	7.03367	54.8311	3.41297	16.7118	2.23608	1.74179	21.0663	54.2047	3.59604	11.2338	5.07372	16.4305	9.46115
SMB-ANK-027	Sumba	Anakalang	30/07/2016	35	ChelzieJanFeb2017_17	21/12/2016	MagAttract HMW DNA Kit	2_3	7.6	2	14931774	48.8945	2.04607	17.7245	9.22375	5.06269	6.89701	n/a	n/a	n/a	n/a	n/a	n/a	n/a	n/a	n/a	n/a	n/a	n/a
SMB-ANK-027	Sumba	Anakalang	30/07/2016	35	ChelzieJanFeb2017_17	21/12/2016	MagAttract HMW DNA Kit	3_3	7.6	3	17077991	48.768	2.03718	18.8028	9.56189	5.30631	6.89842	n/a	n/a	n/a	n/a	n/a	n/a	n/a	n/a	n/a	n/a	n/a	n/a
SMB-ANK-028	Sumba	Anakalang	30/07/2016	54	BatchIreneAndChelzie3	21/12/2016	MagAttract HMW DNA Kit	1_2	6.5	1	15238432	54.7439	2.12144	17.9617	8.48341	5.24996	6.69288	66.6708	2.64116	11.6507	0.919469	3.43104	14.6868	81.7699	3.01069	2.80149	0	6.97227	5.44569
SMB-ANK-029	Sumba	Anakalang	30/07/2016	35	ChelzieJanFeb2017_17	21/12/2016	MagAttract HMW DNA Kit	1_8	6.4	1	15033090	50.7413	2.24194	18.3844	8.63506	4.71248	7.60464	58.5449	2.01042	13.6277	-0.754243	-0.144372	26.7156	61.2048	4.02597	8.7609	5.11704	8.88616	12.0051
SMB-ANK-030	Sumba	Anakalang	30/07/2016	40	ChelzieJanFeb2017_3	21/12/2016	MagAttract HMW DNA Kit	1_4	6	1	13600043	51.7893	2.45105	19.8105	8.6846	5.57674	6.86828	61.8523	2.01846	13.5744	0.835714	5.07566	16.6435	64.0984	5.67875	12.6253	3.51417	8.23033	5.853
SMB-BKB-008	Sumba	Bukambero	22/07/2016	47	ChelzieJanFeb2017_10	30/01/2018	MagAttract HMW DNA Kit	3_3	5.7	3	14390057	49.3725	2.36686	21.923	9.15932	5.44384	6.34803	56.1398	4.29477	21.407	-0.545878	6.10099	12.6034	39.836	8.8059	20.3028	10.0492	17.083	3.9232
SMB-HPM-006	Sumba	Hupu Mada	24/07/2016	64	ChelzieJanFeb2017_6	30/01/2018	MagAttract HMW DNA Kit	3_2	5.6	3	13910892	52.3857	2.89489	21.9216	6.29542	4.47496	6.7445	54.8417	3.11504	18.1305	-0.666813	1.82522	22.7544	51.7769	10.624	20.719	3.464	7.31499	6.10107
SMB-HPM-016	Sumba	Hupu Mada	24/07/2016	37	ChelzieJanFeb2017_14	30/01/2018	MagAttract HMW DNA Kit	3_2	5.6	3	13882559	51.7644	2.19059	21.6089	8.94268	4.1446	6.75176	56.4499	2.94034	18.1912	0.223099	1.60174	20.5938	52.6543	6.17535	22.5719	9.45302	1.8007	7.34473
SMB-HPM-018	Sumba	Hupu Mada	24/07/2016	42	ChelzieJanFeb2017_11	30/01/2018	MagAttract HMW DNA Kit	3_1	5.1	3	16347064	51.1181	2.7396	20.8905	10.0013	4.67353	6.95353	56.0579	4.98723	19.1258	-0.61493	1.19718	19.2468	52.9108	10.2184	15.8405	5.70233	9.15747	6.17053
SMB-HPM-021	Sumba	Hupu Mada	24/07/2016	45	ChelzieJanFeb2017_12	10/08/2017	Gentra Puregene Blood Kit	3_2	5.9	3	18202636	53.1758	2.73324	18.5548	8.06652	4.2826	7.09734	61.0262	3.70648	11.0481	-0.7211	0.943251	23.9971	45.3666	17.0763	17.3593	1.73575	10.4862	7.9758
SMB-HPM-027	Sumba	Hupu Mada	24/07/2016	35	ChelzieJanFeb2017_10	07/09/2017	Gentra Puregene Blood Kit	3_3	5.5	3	16327011	46.596	2.51015	23.7604	9.68509	5.38734	6.90679	47.7268	2.20908	22.7522	-0.189161	3.29378	24.2073	32.4364	11.0497	27.5778	7.20571	14.483	7.24733
SMB-PDT-001	Sumba	Padira Tana	29/07/2016	42	ChelzieJanFeb2017_7	13/03/2017	Gentra Puregene Blood Kit	3_2	6.6	3	17109617	50.8667	2.9737	19.9116	8.38686	3.8562	6.70349	63.9207	4.1999	17.9462	-5.2343	-0.274177	19.4417	61.7364	11.7442	14.3971	5.53481	3.61493	2.97259
SMB-PDT-007	Sumba	Padira Tana	29/07/2016	31	ChelzieJanFeb2017_5	22/08/2016	MagAttract HMW DNA Kit	3_3	5.7	3	17737284	48.3708	2.35918	19.7623	12.2468	5.44952	6.87365	56.039	2.11054	18.9127	8.20919	0.338509	14.3901	54.6909	5.4483	13.1523	8.9513	12.2401	5.51711
SMB-PDT-036	Sumba	Padira Tana	29/07/2016	65	ChelzieJanFeb2017_6	16/06/17	Gentra Puregene Blood Kit	3_3	6	3	15972001	51.5579	1.97923	17.5058	7.50105	5.17172	7.16142	49.75	2.42647	18.5294	-2.27941	4.36765	27.2059	66.6699	5.5058	8.96142	0.0933115	9.94549	8.82408
SMB-PTB-028	Sumba	Patiala Bawa	25/07/2016	NA	ChelzieJanFeb2017_24	16/06/2017	Gentra Puregene Blood Kit	3_3	5.2	3	18432455	49.9841	2.01712	18.8556	10.7987	5.63992	7.43487	61.9438	4.62428	15.8623	-3.19935	3.56231	17.2066	54.5062	5.8762	22.741	1.91921	12.7274	2.22997
SMB-RIN-003	Sumba	Rindi	27/07/2016	75	ChelzieJanFeb2017_7	24/08/2016	MagAttract HMW DNA Kit	3_3	5.6	3	18387618	54.2619	2.03971	18.0851	10.3619	4.53452	6.74836	67.6741	2.61441	15.5558	3.64711	-0.707199	11.2158	65.8461	6.24067	6.97204	9.82859	6.8186	4.294
SMB-RIN-009	Sumba	Rindi	27/07/2016	60	ChelzieJanFeb2017_5	05/09/2017	Gentra Puregene Blood Kit	3_2	6.2	3	17636565	46.2611	2.37055	21.5448	12.2163	3.41072	7.01364	51.7793	5.98922	24.0564	1.0701	-3.13563	20.2406	42.4275	10.0689	23.2429	10.9838	7.37351	5.9033
SMB-RIN-014	Sumba	Rindi	27/07/2016	45	ChelzieJanFeb2017_4	04/08/2016	MagAttract HMW DNA Kit	3_1	6.1	3	18210722	50.0072	3.01253	21.6503	9.92789	3.64383	6.73169	55.6879	8.09516	22.6835	-4.12555	-0.487694	18.1468	55.6664	12.1322	14.6254	6.71953	2.36536	8.49105
SMB-RIN-016	Sumba	Rindi	27/07/2016	33	ChelzieJanFeb2017_7	30/01/2018	MagAttract HMW DNA Kit	3_1	5.6	3	18311451	49.9833	2.78347	21.3639	9.61389	3.66077	6.60706	62.2874	4.10276	16.7094	-2.92415	-0.167094	19.9916	57.0927	11.3714	19.3858	4.79014	0.976464	6.38353
SMB-RIN-019	Sumba	Rindi	27/07/2016	31	ChelzieJanFeb2017_16	24/08/2016	MagAttract HMW DNA Kit	3_2	5.8	3	15942216	49.6433	2.76328	20.6311	8.99235	3.84978	6.68075	59.9742	4.72515	15.2614	0.281748	1.41461	18.343	51.0431	10.6433	12.1445	13.6577	3.95574	8.55567
SMB-WHB-024	Sumba	Wura Homba	23/07/2016	39	ChelzieJanFeb2017_9	30/01/2018	MagAttract HMW DNA Kit	3_1	5.9	3	14783644	51.2284	2.99185	19.8904	8.07284	4.85614	6.4231	63.8614	5.19594	19.1968	-3.36584	1.16205	13.9497	48.9657	14.6893	13.3742	8.70306	11.381	2.8868
SMB-WNG-001	Sumba	Wunga	28/07/2016	55	BatchIreneAndChelzie4	06/12/2016	MagAttract HMW DNA Kit	2_2	5.7	2	18787414	44.0025	3.4899	24.197	9.62728	6.44388	6.23263	44.3275	7.61492	31.7288	-5.0147	4.78254	16.5609	45.0873	14.5503	18.56	5.39339	11.8756	4.53343
SMB-WNG-002	Sumba	Wunga	28/07/2016	55	BatchIreneAndChelzie1	23/08/2016	MagAttract HMW DNA Kit	1_8	6.1	1	15653180	50.5842	2.30615	20.8256	10.5079	5.37763	6.71266	59.8593	2.57897	17.0286	1.92498	3.06022	15.5479	62.3765	3.66866	13.4521	5.88896	9.72876	4.88501
SMB-WNG-003	Sumba	Wunga	28/07/2016	52	BatchIreneAndChelzie1_5_?	23/08/2016	MagAttract HMW DNA Kit	1_3	6.5	1	19413856	50.867	2.51243	20.4676	8.96345	3.92163	6.75501	54.3809	2.84045	18.0964	0.904822	1.6722	22.1051	60.0537	5.07564	16.5027	7.15341	3.11131	8.1033
SMB-WNG-004	Sumba	Wunga	28/07/2016	71	ChelzieJanFeb2017_14	23/08/2016	MagAttract HMW DNA Kit	1_6	6.3	1	16282387	52.4576	2.75746	19.0445	7.76071	5.07242	7.09528	68.1673	3.32306	14.1326	-3.27213	0.206259	17.4429	66.4474	5.99186	9.60579	1.08622	9.60402	7.26472
SMB-WNG-006	Sumba	Wunga	28/07/2016	47	ChelzieJanFeb2017_13	23/08/2016	MagAttract HMW DNA Kit	1_8	6.7	1	15610117	48.9457	2.73639	21.0208	9.53434	5.04465	6.54165	60.4354	5.791	21.1901	-5.0508	1.81422	15.82	59.0364	6.87401	13.2638	5.62777	9.52273	5.67522
SMB-WNG-007	Sumba	Wunga	28/07/2016	61	ChelzieJanFeb2017_15	06/12/2016	MagAttract HMW DNA Kit	1_11	6.4	1	14624844	49.031	2.35156	19.9612	11.1803	5.87542	7.02364	39.4026	2.3444	18.6838	16.7797	5.41473	17.3747	58.7553	4.09073	6.54527	8.8758	17.3734	4.35946
SMB-WNG-009	Sumba	Wunga	28/07/2016	48	ChelzieJanFeb2017_11	06/12/2016	MagAttract HMW DNA Kit	1_10	6.9	1	13915360	50.711	3.14777	22.3936	9.50043	5.51362	6.38482	62.08	3.23175	15.5171	-1.1177	3.83844	16.4504	66.037	7.80237	15.8249	0	6.60004	3.73569
SMB-WNG-012	Sumba	Wunga	28/07/2016	48	ChelzieJanFeb2017_10	06/12/2016	MagAttract HMW DNA Kit	1_1	5.5	1	13085274	53.4193	2.67972	19.3558	7.84518	3.86852	7.14159	70.1	1.41496	9.40788	-0.362922	0.645914	18.7942	73.3814	5.92252	7.95948	1.33642	3.97817	7.42198
SMB-WNG-014	Sumba	Wunga	28/07/2016	46	BatchIreneAndChelzie3	07/12/2016	MagAttract HMW DNA Kit	1_12	6.5	1	14929956	48.4272	2.96393	22.7258	10.9829	3.84071	6.53579	60.1927	2.71555	11.8383	13.6403	0.175197	11.4379	57.459	8.71788	11.4764	10.7816	6.86089	4.70421
SMB-WNG-017	Sumba	Wunga	28/07/2016	58	ChelzieJanFeb2017_2	07/12/2016	MagAttract HMW DNA Kit	1_5	6.6	1	14136038	58.8568	2.41333	15.621	7.74628	3.60368	6.99956	80.8563	2.13896	5.96511	-0.177017	-0.123543	11.3402	82.2912	4.45324	3.64436	1.36292	3.27126	4.97703
SMB-WNG-018	Sumba	Wunga	28/07/2016	36	BatchIreneAndChelzie3	23/08/2016	MagAttract HMW DNA Kit	1_9	5.3	1	11288135	48.3928	2.89317	22.6932	9.92273	4.12036	6.75393	49.7251	5.89126	23.8456	-1.5149	0.591932	21.461	55.2877	9.8797	14.5792	7.26194	5.71918	7.27234
SMB-WNG-020	Sumba	Wunga	28/07/2016	44	ChelzieJanFeb2017_27	23/08/2016	MagAttract HMW DNA Kit	1_3	6.4	1	14520767	48.215	3.03037	24.3396	9.68835	3.41261	6.55641	58.4695	6.46748	16.2311	2.59698	-0.495674	16.7306	61.6395	8.43017	15.3349	5.91528	3.18635	5.49378
SMB-WNG-021	Sumba	Wunga	28/07/2016	45	ChelzieJanFeb2017_22	07/12/2016	MagAttract HMW DNA Kit	1_3	6.2	1	18170956	52.4661	2.74589	21.5634	8.96698	3.43543	7.06804	60.4095	4.07524	11.0412	1.21834	0.693779	22.5619	69.5355	6.96563	7.77547	5.46176	0	10.2616
SMB-WNG-021	Sumba	Wunga	28/07/2016	45	ChelzieJanFeb2017_22	07/12/2016	MagAttract HMW DNA Kit	3_2	6.2	3	17326194	53.5292	2.55545	18.8583	8.80922	3.21647	7.03192	n/a	n/a	n/a	n/a	n/a	n/a	n/a	n/a	n/a	n/a	n/a	n/a
SMB-WNG-022	Sumba	Wunga	28/07/2016	47	ChelzieJanFeb2017_3	23/08/2016	MagAttract HMW DNA Kit	1_1	6.2	1	15314573	50.8352	2.4758	19.8558	10.0667	5.08051	7.1468	45.8216	3.35968	19.7628	5.9712	2.21626	22.8684	66.5693	4.65833	9.24668	4.41036	7.24024	7.8751
SMB-WNG-023	Sumba	Wunga	28/07/2016	49	ChelzieJanFeb2017_14	23/08/2016	MagAttract HMW DNA Kit	1_8	6.1	1	12899026	49.6157	2.71217	22.8352	10.0441	4.85866	6.486	57.0462	5.63317	17.1496	2.2747	0.508533	17.3878	64.5823	6.27071	16.3263	2.62578	6.26512	3.92981
SMB-WNG-028	Sumba	Wunga	28/07/2016	66	ChelzieJanFeb2017_22	23/08/2016	MagAttract HMW DNA Kit	1_2	5.7	1	16536498	56.1425	1.83166	18.826	8.25386	5.61441	6.85998	62.6698	1.05053	15.1241	3.31462	3.26028	14.5807	77.6754	1.40534	6.23855	2.68887	6.1098	5.88208
