# Supplementary material for: Genome-wide DNA methylation and gene expression patterns reflect genetic ancestry and environmental differences across the Indonesian archipelago
Source: PLoS Genet. 2020 May 26;16(5):e1008749. doi: 10.1371/journal.pgen.1008749 (PMC7274483; doi:10.1371/journal.pgen.1008749)
Supplement: S9 Table — (XLSX) [file pgen.1008749.s009.xlsx]

## Sheet: ST 9A. GO DMP MTWvsKOR
Supplementary Table 9A. Gene ontology enrichment (FDR < 5%) for DMP (with FDR<1%; logFC>0.5) between MTW and KOR
ONTOLOGY	TERM	N	DE	P.DE	FDR
CC	integral component of plasma membrane	890	363.167	2.98799e-11	5.22241e-07
CC	plasma membrane	4271	1377.5	2.56744e-09	2.24369e-05
MF	calcium ion binding	631	263.881	8.85812e-08	0.000516074
MF	DNA-binding transcription factor activity, RNA polymerase II-specific	1537	549.25	2.15292e-07	0.000940718
CC	cell surface	530	224	3.1689e-07	0.00110772
BP	positive regulation of neuron differentiation	84	47	4.86525e-06	0.0141725
MF	sequence-specific DNA binding	297	127	7.17604e-06	0.0179176
CC	transport vesicle membrane	41	27	1.48257e-05	0.0323905
BP	axon guidance	164	91.5	1.94396e-05	0.0377516

## Sheet: ST 9B. GO DMP SMBvsKOR
Supplementary Table 9B. Gene ontology enrichment (FDR < 5%) for DMP (with FDR<1%; logFC>0.5) between SMB and KOR
ONTOLOGY	TERM	N	DE	P.DE	FDR
MF	DNA-binding transcription factor activity, RNA polymerase II-specific	1537	725.283	6.32067e-20	1.10473e-15
CC	plasma membrane	4271	1714.67	6.52226e-18	5.6998e-14
CC	integral component of plasma membrane	890	447.167	6.62897e-17	3.86204e-13
MF	DNA-binding transcription activator activity, RNA polymerase II-specific	390	229.5	1.06106e-14	4.63629e-11
BP	positive regulation of transcription by RNA polymerase II	975	481	6.97247e-12	2.4373e-08
CC	cell surface	530	280.833	8.97423e-12	2.61419e-08
MF	calcium ion binding	631	321.533	4.02647e-11	1.00535e-07
CC	cell junction	531	294.5	5.26689e-11	1.15068e-07
BP	nervous system development	258	150.533	9.37607e-10	1.63875e-06
BP	axon guidance	164	114.5	8.84477e-10	1.63875e-06
MF	sequence-specific DNA binding	297	159.5	1.87263e-09	2.97544e-06
CC	glutamatergic synapse	346	204.5	2.56485e-09	3.7357e-06
BP	chemical synaptic transmission	146	92.5	3.34476e-09	4.4969e-06
BP	G protein-coupled receptor signaling pathway	868	331.333	4.42808e-09	5.52814e-06
BP	extracellular matrix organization	189	119	1.13519e-08	1.32273e-05
BP	cell adhesion	375	201.5	2.20965e-08	2.41377e-05
BP	positive regulation of neuron differentiation	84	57	3.70278e-08	3.8069e-05
BP	homophilic cell adhesion via plasma membrane adhesion molecules	129	78.5333	4.45288e-08	4.08402e-05
BP	signal transduction	827	394.333	4.21776e-08	4.08402e-05
BP	positive regulation of synapse assembly	61	46	4.67333e-08	4.08402e-05
BP	locomotory behavior	83	59	6.76526e-08	5.63063e-05
BP	angiogenesis	217	124.5	8.09928e-08	6.43451e-05
MF	RNA polymerase II regulatory region sequence-specific DNA binding	162	98.5	1.08973e-07	8.28102e-05
MF	RNA polymerase II proximal promoter sequence-specific DNA binding	379	201.5	1.32815e-07	9.67222e-05
CC	collagen-containing extracellular matrix	355	178	1.9931e-07	0.000139342
BP	neuropeptide signaling pathway	64	40	4.29029e-07	0.000288407
CC	postsynaptic membrane	174	107.5	4.97477e-07	0.000322033
BP	ureteric bud development	37	31	6.01104e-07	0.000375218
BP	inner ear morphogenesis	54	41.5	9.35681e-07	0.000563925
BP	neuron migration	106	69	2.16306e-06	0.00121955
BP	anatomical structure morphogenesis	81	52	2.12307e-06	0.00121955
BP	negative regulation of transcription by RNA polymerase II	707	340.667	2.39405e-06	0.00128055
BP	sensory perception of sound	131	83.5	2.4178e-06	0.00128055
MF	DNA-binding transcription factor activity	480	236	3.5598e-06	0.00182995
CC	dendrite	331	180.5	5.11875e-06	0.00255347
CC	perikaryon	127	76.5	5.25946e-06	0.00255347
CC	transcription factor complex	145	84.5	6.46839e-06	0.00305553
CC	receptor complex	127	78.5	7.01193e-06	0.00322512
MF	DNA-binding transcription repressor activity, RNA polymerase II-specific	224	123.5	7.22872e-06	0.00323958
BP	positive regulation of transcription regulatory region DNA binding	16	15	8.6332e-06	0.00377228
BP	outflow tract septum morphogenesis	27	24	9.28531e-06	0.00395826
BP	branching involved in ureteric bud morphogenesis	43	33	9.85013e-06	0.00409906
MF	heme binding	106	58.5	1.1077e-05	0.00450243
CC	axon	218	123.5	1.24969e-05	0.00496413
BP	forebrain development	45	33	1.34036e-05	0.00520598
BP	ionotropic glutamate receptor signaling pathway	23	21	1.41243e-05	0.0053666
CC	integral component of presynaptic membrane	60	42	1.58949e-05	0.00591087
BP	anterior/posterior pattern specification	62	42	1.70833e-05	0.00622046
MF	heparin binding	148	80	1.94481e-05	0.00693701
BP	heart development	167	94.5	2.58979e-05	0.00905287
BP	response to lipopolysaccharide	129	68.5	3.09903e-05	0.0106206
BP	negative regulation of neuron differentiation	54	38	3.3783e-05	0.0111407
BP	regulation of postsynaptic membrane potential	24	21	3.36493e-05	0.0111407
BP	embryonic forelimb morphogenesis	33	26	3.86951e-05	0.0125243
BP	regulation of presynapse assembly	27	22	4.0227e-05	0.0127834
BP	cell surface receptor signaling pathway	200	97.5	4.73088e-05	0.0147654
BP	sensory perception of pain	53	34.5	4.89689e-05	0.0150154
BP	metanephros development	28	22	5.02353e-05	0.0151382
BP	cell fate determination	17	16	5.37387e-05	0.0159194
BP	response to hypoxia	157	87	5.59939e-05	0.016311
BP	inner ear development	46	31.5	5.82651e-05	0.0166944
BP	central nervous system development	99	61	7.58654e-05	0.0213867
BP	embryonic hindlimb morphogenesis	27	22.5	9.14114e-05	0.0249639
CC	GABA-ergic synapse	70	47	9.12454e-05	0.0249639
BP	positive regulation of cytosolic calcium ion concentration	105	58	9.798e-05	0.0263461
BP	positive regulation of MAPK cascade	95	55.5	0.00012109	0.0315882
BP	embryonic skeletal system morphogenesis	34	25	0.000119962	0.0315882
BP	embryonic limb morphogenesis	36	27	0.000137929	0.0354519
BP	learning or memory	53	36	0.000142351	0.036058
CC	transport vesicle membrane	41	28	0.000149284	0.037274
CC	neuronal cell body	326	165.5	0.000159578	0.0392832
BP	negative regulation of cell proliferation	420	195.667	0.000173971	0.0422314
BP	negative regulation of neuron apoptotic process	138	76.3333	0.000181539	0.0434648
BP	pulmonary valve morphogenesis	15	14	0.000195225	0.0454953
BP	neuroblast proliferation	16	14	0.000193273	0.0454953
BP	behavioral fear response	29	22	0.000199598	0.0459022
BP	response to estradiol	95	55.6667	0.000202295	0.0459183
BP	positive regulation of epithelial cell proliferation	58	37	0.000217246	0.0480636
BP	roof of mouth development	62	41	0.000216728	0.0480636
BP	dopaminergic neuron differentiation	19	16	0.000225989	0.0493729
BP	glutamate receptor signaling pathway	15	14	0.000231143	0.0497606
BP	negative regulation of canonical Wnt signaling pathway	166	87	0.000233457	0.0497606

## Sheet: ST 9C. GO DMP SMBvsMTW
Supplementary Table 9B. Gene ontology enrichment (FDR < 5%) for DMP (with FDR<1%; logFC>0.5) between SMB and MTW
ONTOLOGY	TERM	N	DE	P.DE	FDR
CC	MHC class II protein complex	16	12	1.45148e-08	0.000253689
BP	regulation of presynapse assembly	27	14	3.03815e-06	0.0265504
